# Supplementary material for: Large-scale preparation for efficient polymer-based room-temperature phosphorescence via click chemistry
Source: PubMed Central journal article supplement — Sci Adv. 2020 May 20;6(21):eaaz6107. doi: 10.1126/sciadv.aaz6107 (PMC7314566; doi:10.1126/sciadv.aaz6107), 2020-05-20
Supplement: aaz6107_SM.pdf [file aaz6107_SM.pdf]

[advances.sciencemag.org/cgi/content/full/6/21/eaaz6107/DC1](https://advances.sciencemag.org/cgi/content/full/6/21/eaaz6107/DC1)

## Supplementary Materials for

### **Large-scale preparation for efficient polymer-based room-temperature phosphorescence via click chemistry**

R. Tian, S.-M. Xu, Q. Xu, C. Lu\*

\*Corresponding author. Email: [luchao@mail.buct.edu.cn](mailto:luchao@mail.buct.edu.cn)

Published 20 May 2020, *Sci. Adv.* **6**, eaaz6107 (2020)

DOI: [10.1126/sciadv.aaz6107](https://doi.org/10.1126/sciadv.aaz6107)

#### **This PDF file includes:**

Figs. S1 to S9  
Table S1

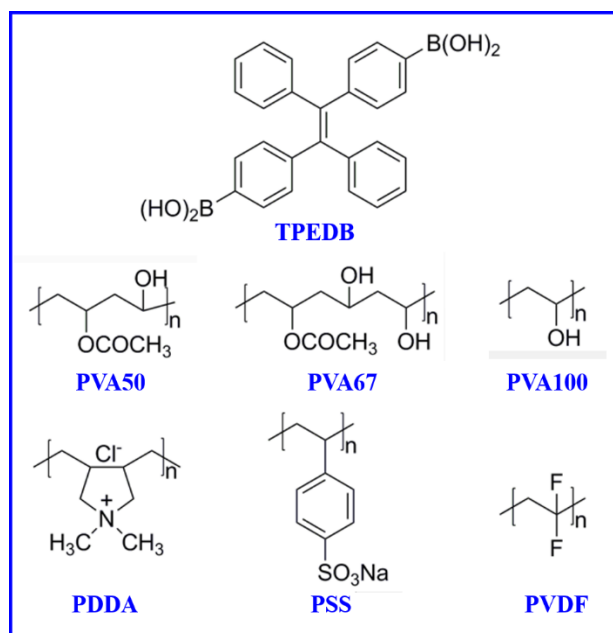

**Fig. S1. Molecular formulae of phosphors and polymer matrices.** The molecular formulae of TPEDB, PVA with different alcoholysis degree (PVA50, PVA67, PVA100), and controlled polymers (PDDA, PSS, and PVDF).

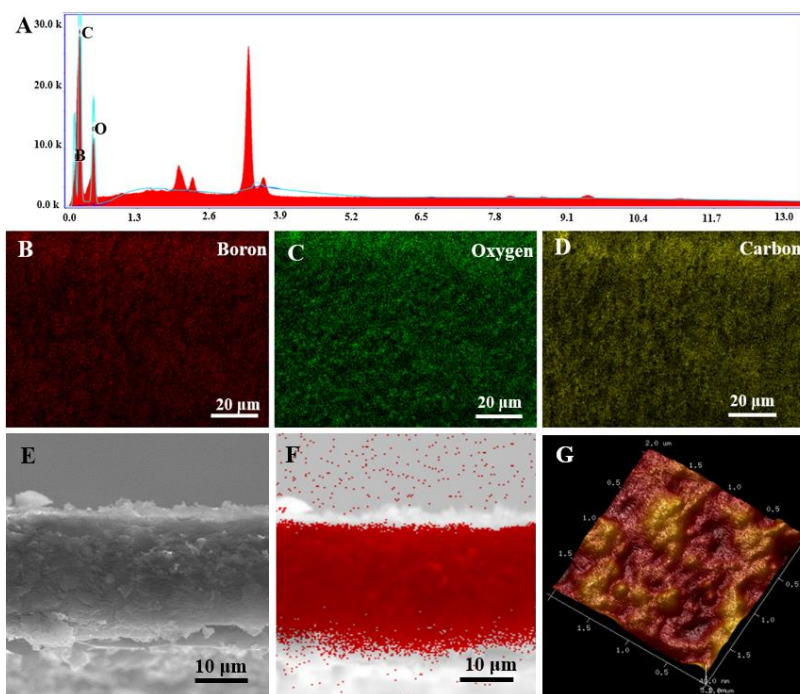

**Fig. S2. Morphological studies of TPEDB-PVA polymeric material.** (A) Element analysis, top-view EDX mapping of (B) boron, (C) oxygen and (D) carbon elements; (E) side-view image, (F) merged element distribution for the TPEDB-PVA polymeric material and (G) surface observation by the tapping mode of atomic force microscopy.

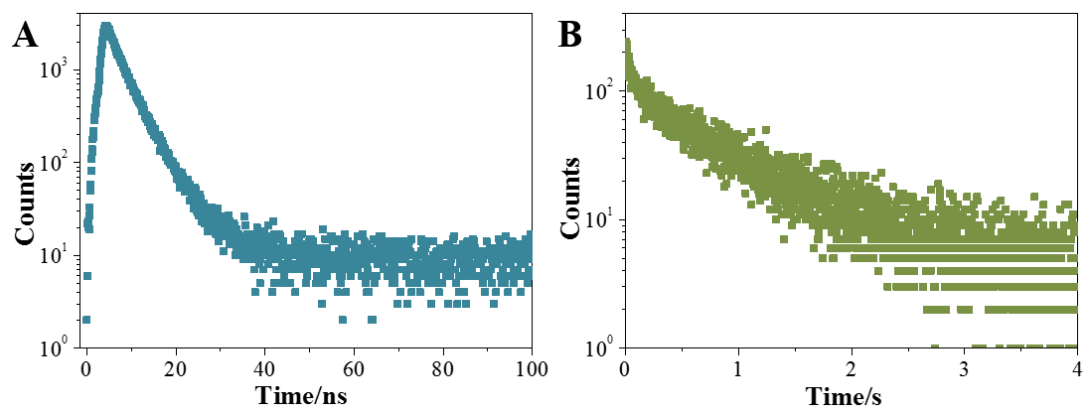

**Fig. S3. Luminescent decay curves of TPEDB-PVA polymeric material. (A)** Fluorescence and **(B)** phosphorescence decay curves of TPEDB-PVA polymeric material with the content of TPEDB of 0.08 mg.

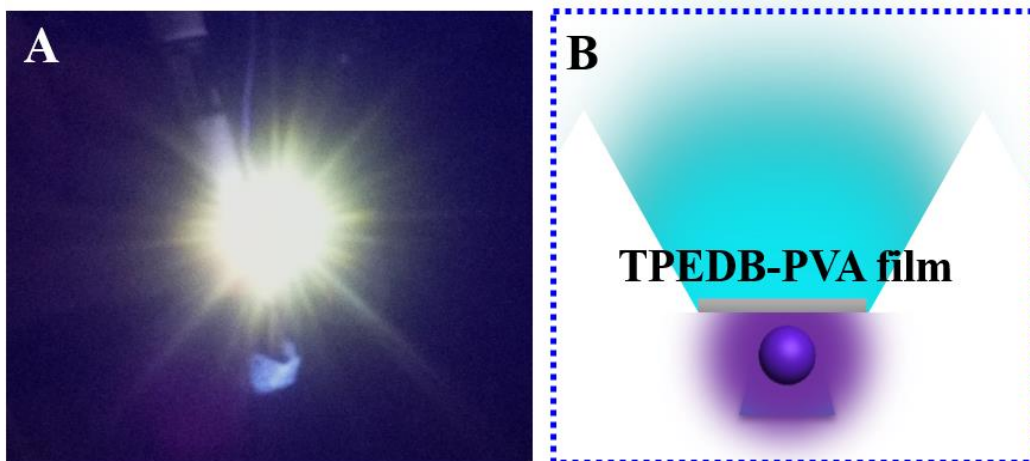

**Fig. S4. Schematic illustration for the assembly on LED.** (A) Photograph of commercial ultraviolet light-emitting diode (UV-LED) and (B) schematic illustration of photos for the TPEDB-PVA polymeric material on the UV-LED. Fig. S4A, Photo credit: Qi Xu (coauthor), Beijing University of Chemical Technology.

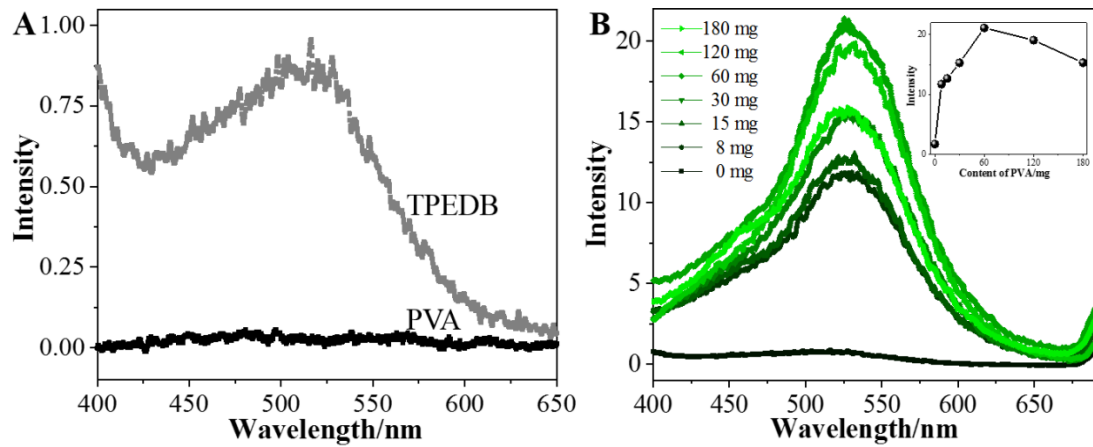

**Fig. S5. RTP spectra of TPEDB-PVA polymeric materials.** RTP properties of (A) TPEDB and PVA, and (B) TPEDB-PVA polymeric materials with PVA contents varying from 0 mg to 180 mg; the inset showed the RTP intensity varying with PVA contents.

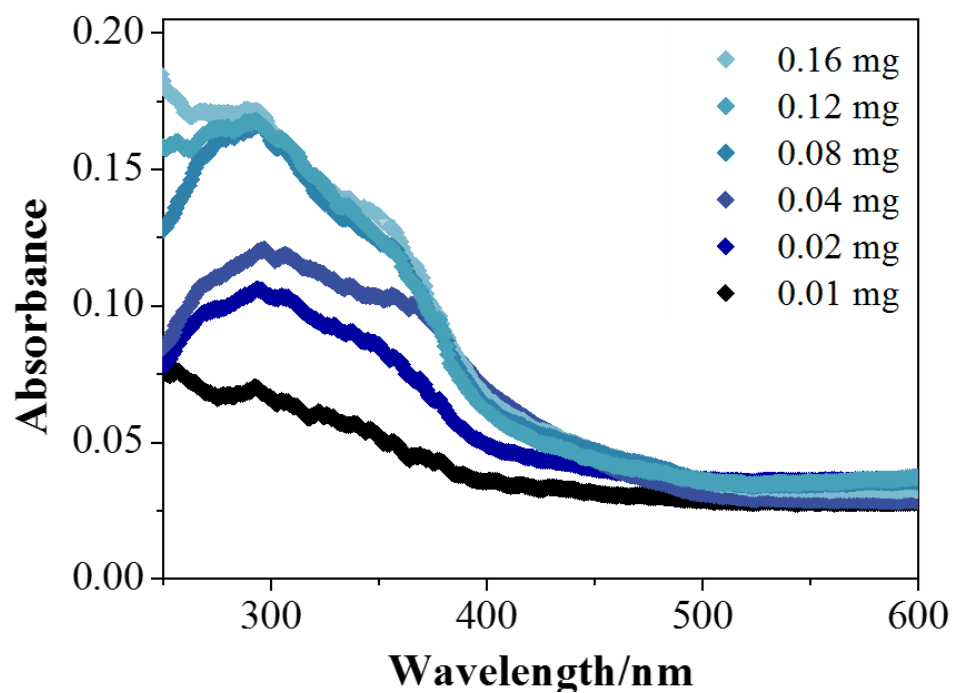

**Fig. S6. UV-Vis absorption spectra of TPEDB-PVA polymeric materials.** The contents of TPEDB ranged from 0.01 mg, 0.02 mg, 0.04 mg, 0.08 mg, 0.12 mg to 0.16mg, respectively.

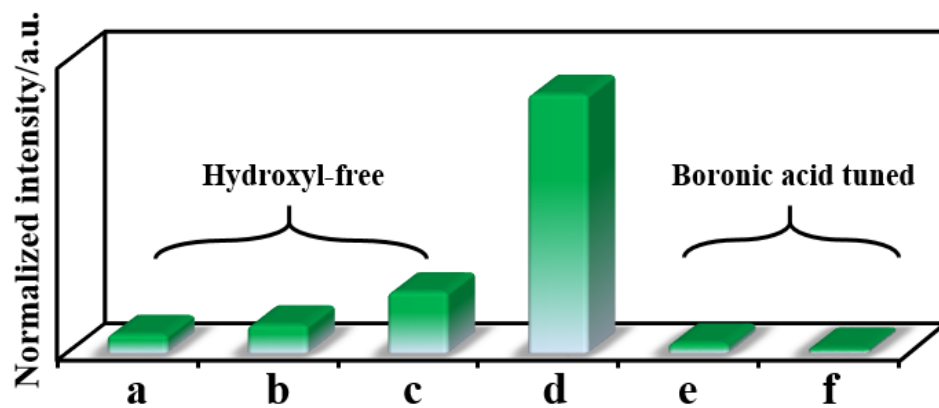

**Fig. S7. RTP intensities of controlled samples.** (a) TPEDB-PVDF, (b) TPEDB-PSS, (c) TPEDB-PDDA, (d) TPEDB-PVA, (e) TPE-PVA, and (f) TPEMB-PVA polymeric materials.



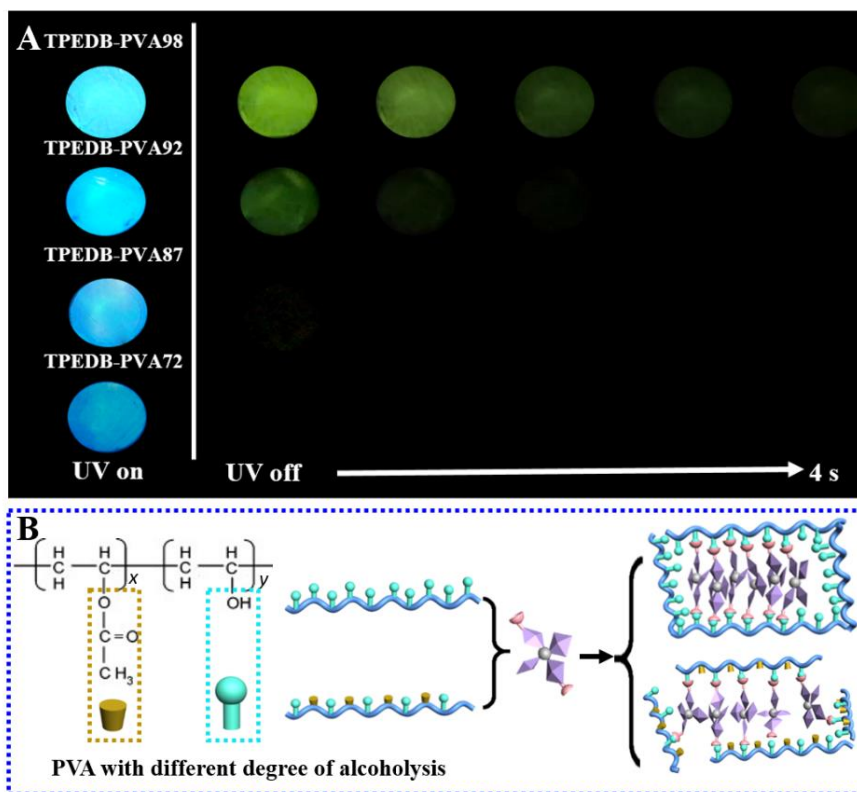

**Fig. S8. Luminescent behaviors of TPEDB-PVA polymeric materials.** (A) Digital photographs of TPEDB-PVA polymeric materials (TPEDB of 0.08 mg) under 365 nm UV irradiation and at different time intervals after removal of UV irradiation, the alcoholysis degree of PVA varied from 72%, 87%, 92%, to 98%; (B) schematic representation of the molecular alignment in the TPEDB-PVA polymeric material with different alcoholysis degree of PVA. Fig. S8A, Photo credit: Qi Xu (coauthor), Beijing University of Chemical Technology.

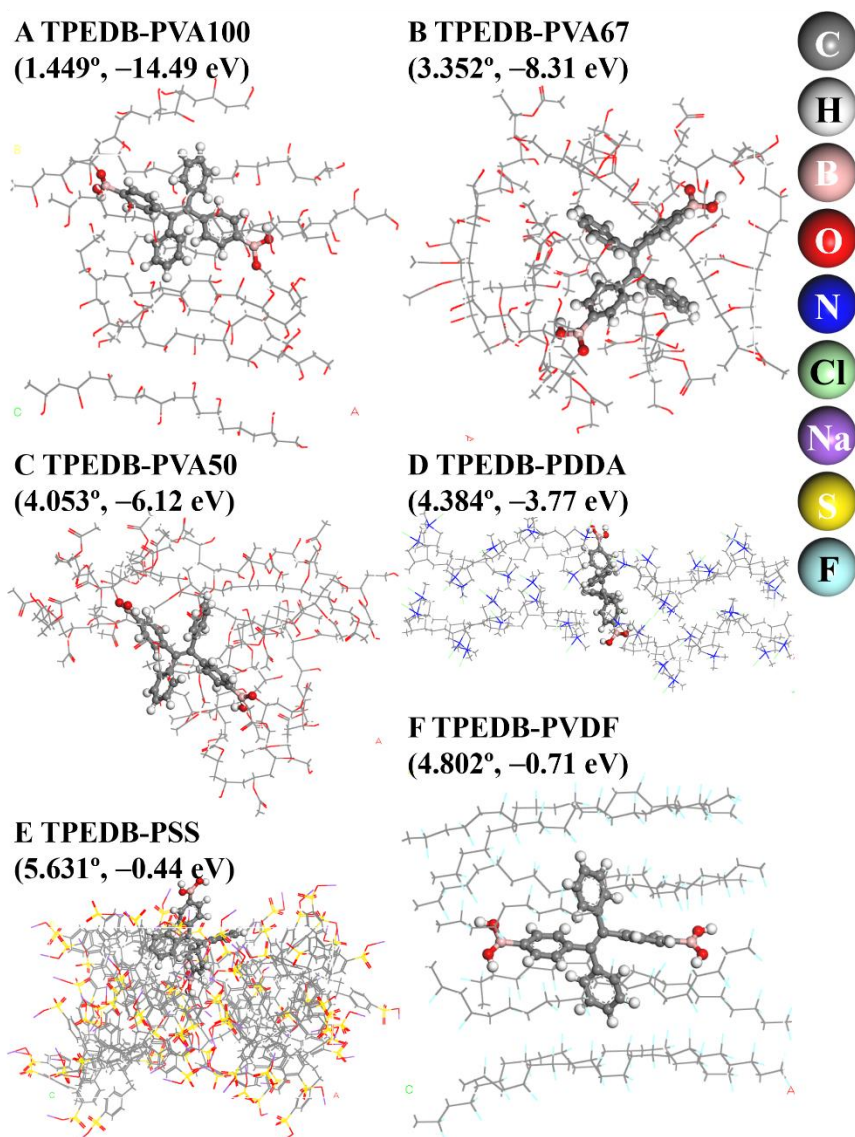

**Fig. S9. Geometrical studies of TPEDB and TPEDB-polymer materials.** (A) TPEDB, (B) TPEDB-PVA50, (C) TPEDB-PVA67, (D) TPEDB-PVA100, (E) TPEDB-PDDA, (F) TPEDB-PVDF, and (G) TPEDB-PSS models at the simulation time of 20 ps. The color for each element is labeled. The integral of the dihedral angle away from the equilibrium state ( $\sum P|d - \bar{d}|$ ) and binding energy (EB) are listed in the bracket.

**Table S1. Descartes coordinates of TPEDB (ground state).**

| element | coordinates    |                |                | element | coordinates    |                |                |
|---------|----------------|----------------|----------------|---------|----------------|----------------|----------------|
|         | $x/\text{\AA}$ | $y/\text{\AA}$ | $z/\text{\AA}$ |         | $x/\text{\AA}$ | $y/\text{\AA}$ | $z/\text{\AA}$ |
| C       | -0.4095        | -0.5473        | 0.1014         | C       | 0.3290         | 2.9576         | -0.6366        |
| C       | 0.4096         | 0.5473         | 0.1015         | H       | 1.8649         | -0.8767        | -1.7239        |
| H       | -4.2928        | 0.9954         | -1.9605        | C       | 1.8964         | 0.4431         | -0.0231        |
| C       | -4.7310        | -0.3035        | -0.2801        | C       | 2.7404         | 1.1642         | 0.8431         |
| C       | -4.1254        | -1.0869        | 0.7222         | H       | 2.3015         | 1.7834         | 1.6139         |
| H       | -4.7586        | -1.6390        | 1.4032         | C       | 4.1255         | 1.0873         | 0.7219         |
| C       | -2.7403        | -1.1638        | 0.8434         | H       | 4.7586         | 1.6396         | 1.4027         |
| H       | -2.3014        | -1.7828        | 1.6144         | C       | 4.7311         | 0.3036         | -0.2801        |
| C       | -1.8963        | -0.4431        | -0.0231        | C       | 3.8792         | -0.3946        | -1.1569        |
| C       | -2.4932        | 0.3302         | -1.0350        | H       | 4.2929         | -0.9960        | -1.9600        |
| H       | -1.8649        | 0.8763         | -1.7242        | C       | 2.4933         | -0.3304        | -1.0348        |
| C       | -3.8791        | 0.3944         | -1.1572        | B       | -6.2817        | -0.2409        | -0.3911        |
| H       | -0.2064        | -5.0291        | -1.1939        | B       | 6.2817         | 0.2409         | -0.3910        |
| C       | -0.3290        | -2.9576        | -0.6367        | O       | -6.9759        | 0.5710         | -1.2697        |
| H       | -1.0356        | -2.7131        | -1.4185        | O       | -7.0371        | -1.0383        | 0.4359         |
| C       | 0.1103         | -1.9446        | 0.2360         | O       | 6.9760         | -0.5704        | -1.2702        |
| C       | 1.0066         | -2.2926        | 1.2624         | O       | 7.0372         | 1.0377         | 0.4365         |
| H       | 1.3404         | -1.5313        | 1.9533         | H       | -6.5067        | 1.1752         | -1.8575        |
| C       | 1.4635         | -3.6039        | 1.3996         | H       | -7.9999        | -0.9768        | 0.3540         |
| H       | 2.1490         | -3.8512        | 2.1995         | H       | 6.5069         | -1.1740        | -1.8587        |
| C       | 1.0350         | -4.5954        | 0.5126         | H       | 8.0000         | 0.9762         | 0.3545         |
| H       | 1.3901         | -5.6119        | 0.6189         | H       | -1.3905        | 5.6117         | 0.6188         |
| C       | 0.1359         | -4.2668        | -0.5062        | C       | -1.4638        | 3.6038         | 1.3995         |
| H       | 1.0358         | 2.7132         | -1.4183        | H       | -2.1495        | 3.8510         | 2.1993         |
| C       | -0.1360        | 4.2668         | -0.5061        | C       | -1.0067        | 2.2924         | 1.2624         |
| H       | 0.2063         | 5.0291         | -1.1938        | H       | -1.3405        | 1.5311         | 1.9533         |
| C       | -1.0353        | 4.5952         | 0.5126         | C       | -0.1103        | 1.9446         | 0.2361         |
